# Supplementary material
Source: publisher figshare collection journal article supplement (https://gsajournals.figshare.com/articles/dataset/_/13373021)
Supplement: Supplementary file 1 [file 1]

**SUPPORTING TABLE**

YVC392 *MAT*a/*MAT* *can1-100/can1-100 his3-11,15/his3-11,15 leu2-3,112/leu2-3,112 trp1-1/trp1-1* *ura3-1/ura3-1 rtt105∆(::URA3)/RTT105*

YVC395 *MAT*a/*MAT* *can1-100/can1-100 his3-11,15/his3-11,15 leu2-3,112/leu2-3,112 trp1-1/trp1-1* *ura3-1/ura3-1 rtt105∆(::URA3)/RTT105 pif1∆(::KanMX6)/PIF1*

YVC396 *MAT*a/*MAT* *can1-100/can1-100 his3-11,15/his3-11,15 leu2-3,112/leu2-3,112 trp1-1/trp1-1* *ura3-1/ura3-1 rtt105∆(::URA3)/RTT105 rrm3∆(::natMX)/RRM3*

YVC400 *MAT*a/*MAT* *can1-100/can1-100 his3-11,15/his3-11,15 leu2-3,112/leu2-3,112 trp1-1/trp1-1* *ura3-1/ura3-1 rtt105∆(::KanMX6)/RTT105*

YVC401 *MAT*a *can1-100 his3-11,15 leu2-3,112 trp1-1 ura3-1 rtt105∆(::URA3)*

YVC402 *MAT*a *can1-100 his3-11,15 leu2-3,112 trp1-1 ura3-1 rtt105∆(::KanMX6)*

YVC405 *MAT*a/*MAT* *can1-100/can1-100 his3-11,15/his3-11,15 leu2-3,112/leu2-3,112 trp1-1/trp1-1* *ura3-1/ura3-1 rtt105∆(::URA3)/RTT105 orc5-1/ORC5*

YVC410 *MAT*a/*MAT* *can1-100/can1-100 his3-11,15/his3-11,15 leu2-3,112/leu2-3,112 trp1-1/trp1-1* *ura3-1/ura3-1 rtt105∆(::URA3)/RTT105 mcm2-1/MCM2*

YVC412 *MAT*a/*MAT* *can1-100/can1-100 his3-11,15/his3-11,15 leu2-3,112/leu2-3,112 trp1-1/trp1-1* *ura3-1/ura3-1 rtt105∆(::URA3)/RTT105 cdc17-1/CDC17*

YVC413 *MAT*a/*MAT* *can1-100/can1-100 his3-11,15/his3-11,15 leu2-3,112/leu2-3,112 trp1-1/trp1-1* *ura3-1/ura3-1 rtt105∆(::URA3)/RTT105 mrc1∆(::TRP1)/MRC1*

YVC414 *MAT*a/*MAT* *can1-100/can1-100 his3-11,15/his3-11,15 leu2-3,112/leu2-3,112 trp1-1/trp1-1* *ura3-1/ura3-1 rtt105∆(::URA3)/RTT105 mrc1-C14-myc13(::KanMX)/MRC1*

YVC415 *MAT*a/*MAT* *can1-100/can1-100 his3-11,15/his3-11,15 leu2-3,112/leu2-3,112 trp1-1/trp1-1* *ura3-1/ura3-1 rtt105∆(::URA3)/RTT105 tof1∆(::TRP1)/TOF1*

YVC417 *MAT*a/*MAT* *can1-100/can1-100 his3-11,15/his3-11,15 leu2-3,112/leu2-3,112 trp1-1/trp1-1* *ura3-1/ura3-1 rtt105∆(::URA3)/RTT105 mec1∆(::TRP1)/MEC1 sml1∆(::HIS3)/SML1*

YVC418 *MAT*a/*MAT* *can1-100/can1-100 his3-11,15/his3-11,15 leu2-3,112/leu2-3,112 trp1-1/trp1-1* *ura3-1/ura3-1 rtt105∆(::URA3)/RTT105 ctf18∆(::TRP1)/CTF18*

YVC419 *MAT*a/*MAT* *can1-100/can1-100 his3-11,15/his3-11,15 leu2-3,112/leu2-3,112 trp1-1/trp1-1* *ura3-1/ura3-1 rtt105∆(::URA3)/RTT105 rad9∆(::KanMX6)/RAD9*

YVC420 *MAT*a/*MAT* *can1-100/can1-100 his3-11,15/his3-11,15 leu2-3,112/leu2-3,112 trp1-1/trp1-1* *ura3-1/ura3-1 rtt105∆(::URA3)/RTT105 rad53-k227a (::KanMX6)/RAD53*

YVC422 *MAT*a *can1-100 his3-11,15 leu2-3,112 trp1-1* *ura3-1 scc1-73*

YVC423 *MAT*a *can1-100 his3-11,15 leu2-3,112 trp1-1* *ura3-1 scc1-73 rtt105∆(::URA3)*

YVC388 *MAT*a *can1-100 his3-11,15 leu2-3,112 trp1-1* *ura3-1 rfa1-CFP*

YVC399 *MAT*a *can1-100 his3-11,15 leu2-3,112 trp1-1* *ura3-1 rfa1-CFP rtt105∆(::KanMX6)*

SBY885 *MAT*a *ade2-1 can1-100 bar1-1 leu2-3,112 lys2∆ trp1-1 ura3-1 his3-11 :pCUP1GFP12-LacI12 ::HIS cenIII- Lac0128 :TRP1 (S. Biggins)*

YVC426 *MAT*a *ade2-1 can1-100 bar1-1 leu2-3,112 lys2∆ trp1-1 ura3-1 his3-11 :pCUP1GFP12-LacI12 ::HIS cenIII- Lac0128 :TRP1 rtt105∆(::URA3)*

YVC428 *MAT*a/*MAT* *can1-100/can1-100 his3-11,15/his3-11,15 leu2-3,112/leu2-3,112 trp1-1/trp1-1* *ura3-1/ura3-1 rad52∆(::TRP1)/RAD52 rtt105∆(::KanMX6)/RTT105*

YVC429 *MAT*a/*MAT* *can1-100/can1-100 his3-11,15/his3-11,15 leu2-3,112/leu2-3,112 trp1-1/trp1-1* *ura3-1/ura3-1 yku80∆(::TRP1)/YKU80 rtt105∆(::URA3)/RTT105*

YVC430 *MAT*a/*MAT* *can1-100/can1-100 his3-11,15/his3-11,15 leu2-3,112/leu2-3,112 trp1-1/trp1-1* *ura3-1/ura3-1 lif1∆(::URA3)/LIF1 rtt105∆(::KanMX6)/RTT105*

YVC431 *MAT*a/*MAT* *can1-100/can1-100 his3-11,15/his3-11,15 leu2-3,112/leu2-3,112 trp1-1/trp1-1* *ura3-1/ura3-1 sae2∆(::KanMX6)/SAE2 rtt105∆(::URA3)/RTT105*

YVC432 *MAT*a/*MAT* *can1-100/can1-100 his3-11,15/his3-11,15 leu2-3,112/leu2-3,112 trp1-1/trp1-1* *ura3-1/ura3-1 mre11∆(::URA3)/MRE11 rtt105∆(::KanMX6)/RTT105*

YVC433 *MAT*a/*MAT* *can1-100/can1-100 his3-11,15/his3-11,15 leu2-3,112/leu2-3,112 trp1-1/trp1-1* *ura3-1/ura3-1 asf1∆(::KanMX6)/ASF1 rtt105∆(::URA3)/RTT105*

YVC434 *MAT*a/*MAT* *can1-100/can1-100 his3-11,15/his3-11,15 leu2-3,112/leu2-3,112 trp1-1/trp1-1* *ura3-1/ura3-1 rtt109∆(::LEU2)/RTT109 rtt105∆(::URA3)/RTT105*

YVC435 *MAT*a/*MAT* *can1-100/can1-100 his3-11,15/his3-11,15 leu2-3,112/leu2-3,112 rad5-535/rad5- 535 trp1- 1/trp1-1* *ura3-1/ura3-1 hht1-hhf1∆(::LEU2)/HHT1-HHF1 hht2-hhf2∆(::KanMX3)/HHT2-HHF2 trp1(::HHT1 K56R-HHF1::TRP1) rtt105∆(::URA3)/RTT105*

YVC436 *MAT*a/*MAT* *can1-100/can1-100 his3-11,15/his3-11,15 leu2-3,112/leu2-3,112 rad5-535/rad5- 535 trp1- 1/trp1-1* *ura3-1/ura3-1 hht1-hhf1∆(::LEU2)/HHT1-HHF1 hht2-hhf2∆(::KanMX3)/HHT2-HHF2 trp1(::HHT1 K9,14,18,23,27R-HHF1::TRP1) rtt105∆(::URA3)/RTT105*

YVC437 *MAT*a/*MAT* *can1-100/can1-100 his3-11,15/his3-11,15 leu2-3,112/leu2-3,112 rad5-535/rad5- 535 trp1- 1/trp1-1* *ura3-1/ura3-1 hht1-hhf1∆(::LEU2)/HHT1-HHF1 hht2-hhf2∆(::KanMX3)/HHT2-HHF2 trp1(::HHT2 K5,8,12R-HHF2::HIS3) rtt105∆(::URA3)/RTT105*

YVC438 *MAT*a/*MAT* *can1-100/can1-100 his3-11,15/his3-11,15 leu2-3,112/leu2-3,112 trp1-1/trp1-1* *ura3-1/ura3-1 rtt105∆(::URA3)/RTT105 hir1∆(::TRP1)/HIR1*

YVC439 *MAT*a/*MAT* *can1-100/can1-100 his3-11,15/his3-11,15 leu2-3,112/leu2-3,112 trp1-1/trp1-1* *ura3-1/ura3-1 rtt105∆(::URA3)/RTT105 hir2∆(::TRP1)/HIR2*

LPY917 *MAT*a *ade2-101 trp1∆1 leu2∆1 his3∆200 lys2-801 TELadh4(::URA3)* (L. Pillus, D. Gottschling)

YVC440 *MAT*a *ade2-101 trp1∆1 leu2∆1 his3∆200 lys2-801 TELadh4(::URA3) rtt105∆(::TRP1)*

YVC441 *MAT*a *ade2-101 trp1∆1 leu2∆1 his3∆200 lys2-801 TELadh4(::URA3) yku80∆(::TRP1)*

YLS409 *MAT* *ade2-1 can1-100 his3-11,15 leu2-3,112 trp1-1 ura3-1 hmr∆77-144*::*SUP4-o* *HMR::ADE2* (D. Shore)

YLS410 *MAT* *ade2-1 can1-100 his3-11,15 leu2-3,112 trp1-1 ura3-1 hmr∆77-144*::*SUP4-o* *HMR::2EDA* (D. Shore)

YVC510 *MAT* *ade2-1 can1-100 his3-11,15 leu2-3,112 trp1-1 ura3-1 hmr∆77-144*::*SUP4-o* *HMR::ADE2 rtt105∆(::TRP1)*

YVC512 *MAT* *ade2-1 can1-100 his3-11,15 leu2-3,112 trp1-1 ura3-1 hmr∆77-144*::*SUP4-o* *HMR::2EDA rtt105∆(::TRP1)*

L1139 *MAT*a *lys2-128∆ his3∆200 ura3-167 leu2∆1 trp1∆63 rDNA(::mURA3-LEU2)* (F. Winston)

YVC442 *MAT*a *lys2-128∆ his3∆200 ura3-167 leu2∆1 trp1∆63 rDNA(::mURA3-LEU2) rtt105∆(::TRP1)*

YVC443 *MAT*a *lys2-128∆ his3∆200 ura3-167 leu2∆1 trp1∆63 rDNA(::mURA3-LEU2) sir2∆(::TRP1)*

YVC444 *MAT*a/*MAT* *can1-100/can1-100 his3-11,15/his3-11,15 leu2-3,112/leu2-3,112 trp1-1/trp1-1* *ura3-1/ura3-1 sir2∆(::TRP1)/SIR2 rtt105∆(::KanMX6)/RTT105*

YVC445 *MAT*a/*MAT* *can1-100/can1-100 his3-11,15/his3-11,15 leu2-3,112/leu2-3,112 trp1-1/trp1-1* *ura3-1/ura3-1 sir4∆(::TRP1)/SIR4 rtt105∆(::KanMX6)/RTT105*

YVC446 *MAT*a *can1-100 his3-11,15 leu2-3,112 trp1-1 ura3-1 yku80∆(::TRP1)*

YVC447 *MAT*a *can1-100 his3-11,15 leu2-3,112 trp1-1 ura3-1 yku80(::TRP1) rtt105∆(::KanMX6)*

YVC448 *MAT*a *can1-100 his3-11,15 leu2-3,112 trp1-1 ura3-1 sir2∆(::TRP1)*

YVC449 *MAT*a *can1-100 his3-11,15 leu2-3,112 trp1-1 ura3-1 sir2∆(::TRP1) rtt105∆(::KanMX6)*

YVC450 *MAT*a *can1-100 his3-11,15 leu2-3,112 trp1-1 ura3-1 sir4∆(::TRP1)*

YVC451 *MAT*a *can1-100 his3-11,15 leu2-3,112 trp1-1 ura3-1 sir4(::TRP1) rtt105∆(::KanMX6)*

YVC452 *MAT*a *can1-100 his3-11,15 leu2-3,112 trp1-1 ura3-1 est1∆(::KanMX6)*

YVC453 *MAT*a *can1-100 his3-11,15 leu2-3,112 trp1-1 ura3-1 est1∆(::KanMX6) ) rtt105∆(::TRP1)*

YVC454 *MAT*a/*MAT* *can1-100/can1-100 his3-11,15/his3-11,15 leu2-3,112/leu2-3,112 trp1-1/trp1-1* *ura3-1/ura3-1 rfa1-t11/RFA1 rtt105∆(::KanMX6)/RTT105*

YVC455 *MAT*a/*MAT* *can1-100/can1-100 his3-11,15/his3-11,15 leu2-3,112/leu2-3,112 trp1-1/trp1-1* *ura3-1/ura3-1 rfa1-d228y/RFA1 rtt105∆(::KanMX6)/RTT105*

YVC457 *MAT*a *can1-100 his3-11,15 leu2-3,112 trp1-1 ura3-1 rfa1-d228y/RFA1*

YVC458 *MAT*a *can1-100 his3-11,15 leu2-3,112 trp1-1 ura3-1 rfa1-d228y/RFA1 rtt105∆(::KanMX6)*

YVC492 *MAT*a *can1-100 his3-11,15 leu2-3,112 trp1-1* *ura3-1 est2∆(::LEU2) rtt105∆(:: KanMX6)*

YVC475 *MAT*a/*MAT* *can1-100/can1-100 his3-11,15/his3-11,15 leu2-3,112/leu2-3,112 trp1-1/trp1-1* *ura3-1/ura3-1 rtt105∆(:: KanMX6)/RTT105 est1∆(::KanMX6)/EST1*

YVC492 *MAT*a *can1-100 his3-11,15 leu2-3,112 trp1-1* *ura3-1 pCLB2-CLB2(1-180, L26A)-RFA1*

YVC493 *MAT* *can1-100 his3-11,15 leu2-3,112 trp1-1* *ura3-1 pCLB2-CLB2(1-180, L26A)-RFA1*

YVC494 *MAT*a *can1-100 his3-11,15 leu2-3,112 trp1-1 ura3-1 rtt105∆(::KanMX6) pRS316-NLS-RFA1*

YVC495 *MAT*a/*MAT* *can1-100/can1-100 his3-11,15/his3-11,15 leu2-3,112/leu2-3,112 trp1-1/trp1-1* *ura3-1/ura3-1 rfa1∆(::TRP1)/rfa1-d228y rtt105∆(::KanMX6)/RTT105, pRS316-NLS-RFA1*

YVC496 *MAT*a/*MAT* *can1-100/can1-100 his3-11,15/his3-11,15 leu2-3,112/leu2-3,112 trp1-1/trp1-1* *ura3-1/ura3-1 rtt105∆(::KanMX6)/RTT105 ctf18∆(::TRP1)/CTF18, pRS316-NLS-RFA1*

YVC497 *MAT*a/*MAT* *can1-100/can1-100 his3-11,15/his3-11,15 leu2-3,112/leu2-3,112 trp1-1/trp1-1* *ura3-1/ura3-1 rtt105∆(::KanMX6)/RTT105 scc1-73/SCC1, pRS316-NLS-RFA1*

YVC498 *MAT*a/*MAT* *can1-100/can1-100 his3-11,15/his3-11,15 leu2-3,112/leu2-3,112 trp1-1/trp1-1* *ura3-1/ura3-1 rtt105∆(::KanMX6)/RTT105 rad52∆(::KanMX6)/RAD52, pRS316-NLS-RFA1*

YVC499 *MAT*a/*MAT* *can1-100/can1-100 his3-11,15/his3-11,15 leu2-3,112/leu2-3,112 trp1-1/trp1-1* *ura3-1/ura3-1 rtt105∆(::URA3)/RTT105 mrc1∆(::Hygromycin)/MRC1, pRS316-NLS-RFA1*

YVC500 *MAT*a/*MAT* *can1-100/can1-100 his3-11,15/his3-11,15 leu2-3,112/leu2-3,112 trp1-1/trp1-1* *ura3-1/ura3-1 rtt105∆(::URA3)/RTT105 tof1∆(::TRP1)/TOF1, pRS316-NLS-RFA1*

**TABLE S1, strains used in this study.** All the strains were based on W303 with the exception of strains L1139, YVC442, and YVC443 (FY2200 background) and strains LPY917, YVC440, YVC441 (UCC1001 background).
